# Supplementary material
Source: PubMed Central journal article supplement (PMC4178674)
Supplement: AEM.01876-14_zam999105690so1.pdf [file AEM.01876-14_zam999105690so1.pdf]

### **Generation of Lachnospiraceae family-specific qPCR primers.**

Sequences of the 16S rRNA gene from 27 Lachnospiraceae type strains (Table S1) were downloaded from the ribosomal database project (Cole et al. 2009) and aligned using clustal omega (Goujon et al. 2010). A consensus sequence was manually derived from the alignment and regions where 'universal' bacterial primers occurred were masked. Remaining regions were searched for areas of consensus at least 20 bases in length and incorporating no more than two redundant positions. These regions were flagged as potential primer sites and all possible primers were tested with the primer-BLAST tool (Ye et al. 2012). Six possible primer sets were identified as being suitable for qPCR (amplicons less than 200bp) and specific for members of the Lachnospiraceae family. All six primer sets were purchased and tested for specificity against a panel of common gut bacteria including members of 19 different bacterial families (Table S2). Two primer sets showed good specificity for members of the Lachnospiraceae and these were further tested for amplification efficiency using *Blautia producta* (DSM2950) genomic DNA as a target. The primer set chosen (see Table 1) was specific for members of the Lachnospiraceae tested and had close to 100% amplification efficiency.

**Cole JR, Wang Q, Cardenas E, Fish J, Chai B, Farris RJ, Kulam-Syed-Mohideen AS, McGarrell DM, Marsh T, Garrity GM & Tiedje JM.** The Ribosomal Database Project: improved alignments and new tools for rRNA analysis. 2009. *Nucleic Acids Res.* 37 (Database issue): D141-145; doi: [10.1093/nar/gkn879](https://doi.org/10.1093/nar/gkn879) [PMID: 19004872]

**Goujon M, McWilliam H, Li W, Valentin F, Squizzato S, Paern J & Lopez R. A.** new bioinformatics analysis tools framework at EMBL-EBI. 2010. *Nucleic Acids Res.* 38: Issue suppl 2, W695 – W699.

**Ye J, Coulouris G, Zaretskaya I, Cutcutache I, Rozen S & Madden TL.** Primer-BLAST: a tool to design target-specific primers for polymerase chain reaction. 2012. *BMC Bioinformatics.* 13: 134.

**Supplementary Table S1:** List of species used to generate Lachnospiraceae family specific primers for qPCR

| <b>RDP link</b>                                   | <b>Species description</b>                        |
|---------------------------------------------------|---------------------------------------------------|
| <a href="#"><u>AJ270487.2:1..1456</u></a>         | Anaerostipes caccae (T); L1-92                    |
| <a href="#"><u>X73443.1:1..1524</u></a>           | Clostridium nexile (T); DSM 1787                  |
| <a href="#"><u>FR749935.1:&lt;1..&gt;1522</u></a> | Eubacterium fissicatena; type strain: DSM 3598; 1 |
| <a href="#"><u>AB008552.1:&lt;1..&gt;1508</u></a> | Eubacterium ruminantium (T); GA195                |
| <a href="#"><u>AJ270482.2:1..1485</u></a>         | Roseburia hominis (T); type strain: A2-183        |
| <a href="#"><u>AY169419.1:&lt;1..&gt;1490</u></a> | Ruminococcus obeum; 1-33                          |
| <a href="#"><u>L34619.1:1..1480</u></a>           | Dorea formicigenerans (T)                         |
| <a href="#"><u>L76604.1:1..1418</u></a>           | Ruminococcus torques (T); ATCC 27756              |
| <a href="#"><u>EF031543.1:&lt;1..&gt;1440</u></a> | Coprococcus eutactus (T); ATCC 27759              |
| <a href="#"><u>AB571656.1:&lt;1..&gt;1493</u></a> | Blautia coccoides (T); JCM 1395                   |
| <a href="#"><u>AJ270473.3:1..1454</u></a>         | Roseburia inulinivorans (T); type strain: A2-194  |
| <a href="#"><u>L34627.1:1..1468</u></a>           | Eubacterium rectale (T)                           |
| <a href="#"><u>L76595.1:1..1427</u></a>           | Blautia producta (T); ATCC 27340                  |
| <a href="#"><u>AB439724.1:&lt;1..&gt;1468</u></a> | Blautia glucerasea (T); HFTH-1                    |
| <a href="#"><u>X85101.1:1..1457</u></a>           | Ruminococcus obeum (T)                            |
| <a href="#"><u>X95624.1:1..1458</u></a>           | Blautia hydrogenotrophica (T); S5a36              |
| <a href="#"><u>AJ132842.1:30..1345</u></a>        | Dorea longicatena (T); III-35                     |
| <a href="#"><u>FR749932.1:&lt;1..&gt;1616</u></a> | Eubacterium hadrum; type strain: DSM 3319         |
| <a href="#"><u>AB038359.1:1..1315</u></a>         | Coprococcus catus (T); VPI-C6-61                  |
| <a href="#"><u>AY305310.1:&lt;1..&gt;1456</u></a> | Roseburia faecis (T); M72/1                       |
| <a href="#"><u>EF031542.1:&lt;1..&gt;1453</u></a> | Coprococcus comes (T); ATCC 27758                 |
| <a href="#"><u>X94967.1:1..1481</u></a>           | Ruminococcus gnavus (T); ATCC 29149               |
| <a href="#"><u>M59114.2:&lt;1..&gt;1451</u></a>   | Ruminococcus hansenii (T); ATCC 27752             |
| <a href="#"><u>X94966.1:1..1482</u></a>           | Ruminococcus productus (T); ATCC 27340            |
| <a href="#"><u>AF445285.2:1..1525</u></a>         | Robinsoniella peoriensis (T); PPC31               |
| <a href="#"><u>AJ312385.1:&lt;1..&gt;1482</u></a> | Roseburia intestinalis (T); L1-82                 |
| <a href="#"><u>Y18185.1:&lt;1..&gt;1499</u></a>   | Clostridium saccharolyticum (T); DSM 2544         |

| <b>Supplementary Table S2: Species used to test specificity of Lachnospiraceae family-specific qPCR primer pairs</b> |                     |                    |                     |                                             |               |                    |
|----------------------------------------------------------------------------------------------------------------------|---------------------|--------------------|---------------------|---------------------------------------------|---------------|--------------------|
| <i>Phylum</i>                                                                                                        | <i>Class</i>        | <i>Order</i>       | <i>Family</i>       | <i>Genera/species</i>                       | <i>Strain</i> | <i>Type strain</i> |
| Actinobacteria                                                                                                       | Actinobacteria      | Bifidobacteriales  | Bifidobacteriaceae  | <i>Bifidobacterium longum subsp. longum</i> | ATCC 15707    | Yes                |
| Bacteroidetes                                                                                                        | Bacteroidia         | Bacteroidales      | Bacteroidaceae      | <i>Bacteroides vulgatus</i>                 | ATCC 8482     | Yes                |
| Bacteroidetes                                                                                                        | Bacteroidia         | Bacteroidales      | Porphyromonadaceae  | <i>Parabacteroides distasonis</i>           | ATCC 8503     | Yes                |
| Firmicutes                                                                                                           | Bacilli             | Lactobacillales    | Enterococcaceae     | <i>Enterococcus faecium</i>                 | DSM-20477     | Yes                |
| Firmicutes                                                                                                           | Bacilli             | Lactobacillales    | Lactobacillaceae    | <i>Lactobacillus reuterii</i>               | 100-23c       | No                 |
| Firmicutes                                                                                                           | Clostridia          | Clostridiales      | Clostridiaceae      | <i>Clostridium butyricum</i>                | DSM-10702     | Yes                |
| Firmicutes                                                                                                           | Clostridia          | Clostridiales      | Clostridiaceae      | <i>Clostridium disporicum</i>               | DSM-5521      | Yes                |
| Firmicutes                                                                                                           | Clostridia          | Clostridiales      | Lachnospiraceae     | <i>Blautia producta</i>                     | DSM-2950      | Yes                |
| Firmicutes                                                                                                           | Clostridia          | Clostridiales      | Lachnospiraceae     | <i>Ruminococcus obeum</i>                   | DSM-25238     | Yes                |
| Firmicutes                                                                                                           | Clostridia          | Clostridiales      | Lachnospiraceae     | <i>Clostridium nexile</i>                   | DSM-1787      | Yes                |
| Firmicutes                                                                                                           | Clostridia          | Clostridiales      | Lachnospiraceae     | <i>Dorea longicatena</i>                    | DSM-13814     | Yes                |
| Firmicutes                                                                                                           | Clostridia          | Clostridiales      | Lachnospiraceae     | <i>Eubacterium hadrum</i>                   | DSM-3319      | Yes                |
| Firmicutes                                                                                                           | Clostridia          | Clostridiales      | Lachnospiraceae     | <i>Eubacterium rectale</i>                  | DSM-17629     | No                 |
| Firmicutes                                                                                                           | Clostridia          | Clostridiales      | Lachnospiraceae     | <i>Roseburia intestinalis</i>               | DSM-14610     | Yes                |
| Firmicutes                                                                                                           | Clostridia          | Clostridiales      | Ruminococcaceae     | <i>Faecalibacterium prausnitzii</i>         | DSM-17677     | No                 |
| Firmicutes                                                                                                           | Erysipelotrichi     | Erysipelotrichales | Erysipelotrichaceae | <i>Clostridium innocuum</i>                 | DSM-1286      | Yes                |
| Firmicutes                                                                                                           | Erysipelotrichi     | Erysipelotrichales | Erysipelotrichaceae | <i>Clostridium ramosum</i>                  | DSM-1402      | Yes                |
| Proteobacteria                                                                                                       | Alphaproteobacteria | Caulobacterales    | Caulobacteraceae    | <i>Brevundimonas nasdae</i>                 | DSM-14572     | Yes                |
| Proteobacteria                                                                                                       | Betaproteobacteria  | Burkholderiales    | Comamonadaceae      | <i>Delftia acidovorans</i>                  | DSM-39        | Yes                |
| Proteobacteria                                                                                                       | Gammaproteobacteria | Enterobacteriales  | Enterobacteriaceae  | <i>Klebsiella oxytoca</i>                   | DSM-5175      | Yes                |
| Proteobacteria                                                                                                       | Gammaproteobacteria | Pasteurellales     | Pasteurellaceae     | <i>Haemophilus parainfluenzae</i>           | DSM-8978      | Yes                |
| Proteobacteria                                                                                                       | Gammaproteobacteria | Pseudomonadales    | Moraxellaceae       | <i>Acinetobacter guillouiae</i>             | DSM-590       | Yes                |

## ***Lactobacillus*-free mouse microarray control**

### **Method**

Cells were harvested from log phase (4 hours incubation) cultures of *L. reuteri* 100-23 by brief centrifugation at 12,000 x *g* and washed once with 750 µl of RNAProtect Bacteria reagent (Qiagen). *Lactobacillus* free BALB/C mice were sacrificed by cervical dislocation and the stomach contents and scrapings of the epithelial surface were washed once with RNAProtect Bacteria Reagent. Samples were centrifuged at 150 x *g* for 5 min at 5°C, then the supernatant was further centrifuged at 300 x *g* for 5 min at 5°C to remove debris. Bacterial cells were recovered by centrifugation at 5000 x *g* for 5 min at 5°C. and the cell pellets from six mice were pooled in 1 ml of TRIzol® Reagent. Cells from mouse gut and bacterial culture were disrupted by bead beating (5000 rpm, 2 x 40 seconds) and RNA was extracted with chloroform. RNA was precipitated with iso-propanol, dried and resuspended in nuclease-free water. The RNA was further purified using the RNeasy Mini Kit (Qiagen) and DNase treated using a DNA-free kit (Ambion). Contaminating mouse RNA from the stomach-derived samples of *L. reuteri* 100-23 RNA was removed with the MICROBEnrich™ Kit (Ambion, USA).

RNA (2 µg) purified from both culture and mouse stomach was used for cDNA synthesis and labeled with Cy3- or Cy5-dCTP during first strand synthesis using SuperScript II reverse transcriptase kit (Invitrogen) at 42°C for 90 min. Labeled cDNA was purified using a MinElute PCR purification kit (Qiagen) and quantified by Nanodrop spectrophotometer. The labelled samples were mixed and competitively hybridised using an Agilent Gene Expression Hybridisation Kit (part number: 5188-5242) in an Agilent hybridization oven (G2545A) at 65°C for 24 hours. Microarrays were scanned using the Agilent Microarray Scanner System (G2505B) and Agilent scan control software version 7.0 at a resolution of 5 micrometres. Generated scans were converted to data files with Agilent's Feature Extraction software (Version 9.5.3.1) and a single round of Lowess normalization performed. Microarray data were processed as described by García de la Nava et al. 2003 and van Hijum et al. 2005. Differential gene expression was determined by Cyber-T test (Long 2001).

### **Results**

This experiment identified 155 genes, distributed throughout the *L. reuteri* 100-23 genome, that cross-hybridized with RNA from *Lactobacillus*-free mice. Of these 155 genes, twenty-six genes were annotated as phage genes (see Table below). The origin of the cross-hybridized genes must be phage that target bacteria outside of the *Lactobacillus* genus. As a result of the control hybridization, the 155 genes identified in this analysis were excluded from the results of the test hybridization comparing the *in vivo* and *in vitro* gene expression patterns of *L. reuteri* 100-23C.

**Table S3.** The locus tag and function of *L. reuteri* 100-23 genes demonstrating a degree of cross hybridization to material isolated from *Lactobacillus*-free mice.

| <b>Locus Tag</b> | <b>Function</b>                                                                     |
|------------------|-------------------------------------------------------------------------------------|
| Lreu23DRAFT_3014 | Conserved hypothetical protein<br>Binding-protein-dependent transport systems inner |
| Lreu23DRAFT_3031 | membrane component                                                                  |
| Lreu23DRAFT_3053 | Diacylglycerol kinase                                                               |
| Lreu23DRAFT_3065 | DNA polymerase III, alpha subunit                                                   |
| Lreu23DRAFT_3083 | Hypothetical protein Lreu23DRAFT_3083                                               |
| Lreu23DRAFT_3141 | Hypothetical protein Lreu23DRAFT_3141                                               |
| Lreu23DRAFT_3142 | Hypothetical protein Lreu23DRAFT_3142                                               |
| Lreu23DRAFT_3144 | Hypothetical protein Lreu23DRAFT_3144                                               |
| Lreu23DRAFT_3149 | Hypothetical protein Lreu23DRAFT_3149                                               |
| Lreu23DRAFT_3152 | HNH endonuclease                                                                    |
| Lreu23DRAFT_3160 | Hypothetical protein Lreu23DRAFT_3160                                               |
| Lreu23DRAFT_3177 | Glycoside hydrolase family 25                                                       |
| Lreu23DRAFT_3190 | Thymidylate synthase                                                                |
| Lreu23DRAFT_3199 | DNA protecting protein DprA                                                         |
| Lreu23DRAFT_3219 | GCN5-related N-acetyltransferase                                                    |
| Lreu23DRAFT_3265 | Transcriptional regulator, LacI family                                              |
| Lreu23DRAFT_3277 | Recombination protein U                                                             |
| Lreu23DRAFT_3317 | Hypothetical protein Lreu23DRAFT_3317                                               |
| Lreu23DRAFT_3318 | Amino acid/peptide transporter                                                      |
| Lreu23DRAFT_3319 | Metallophosphoesterase                                                              |
| Lreu23DRAFT_3393 | Aminotransferase class I and II                                                     |
| Lreu23DRAFT_3400 | YbaK/prolyl-tRNA synthetase associated region                                       |
| Lreu23DRAFT_3429 | Excinuclease ABC, B subunit                                                         |
| Lreu23DRAFT_3480 | Sugar transporter                                                                   |
| Lreu23DRAFT_3481 | Transcriptional regulator, AraC family                                              |
| Lreu23DRAFT_3493 | Protein of unknown function DUF6 transmembrane                                      |
| Lreu23DRAFT_3553 | Xanthine/uracil/vitamin C permease                                                  |
| Lreu23DRAFT_3585 | DNA mismatch repair protein MutS<br>Haloacid dehalogenase domain protein hydrolase  |
| Lreu23DRAFT_3607 | type 3                                                                              |
| Lreu23DRAFT_3616 | Type II secretion system protein                                                    |
| Lreu23DRAFT_3618 | Conserved hypothetical protein                                                      |
| Lreu23DRAFT_3619 | Hypothetical protein Lreu23DRAFT_3619                                               |
| Lreu23DRAFT_3632 | 6-phosphogluconolactonase                                                           |
| Lreu23DRAFT_3722 | Phospholipid/glycerol acyltransferase                                               |
| Lreu23DRAFT_3738 | Hypothetical protein Lreu23DRAFT_3738                                               |
| Lreu23DRAFT_3739 | Hypothetical protein Lreu23DRAFT_3739                                               |
| Lreu23DRAFT_3772 | Nuclease SbcCD, D subunit                                                           |
| Lreu23DRAFT_3780 | Filamentation induced by cAMP protein Fic                                           |

---

|                  |                                                       |
|------------------|-------------------------------------------------------|
| Lreu23DRAFT_3794 | Hydroxyethylthiazole kinase                           |
| Lreu23DRAFT_3800 | Conserved hypothetical protein                        |
| Lreu23DRAFT_3803 | Transport system permease protein                     |
| Lreu23DRAFT_3849 | Glycoside hydrolase family 25                         |
| Lreu23DRAFT_3851 | Hypothetical protein Lreu23DRAFT_3851                 |
| Lreu23DRAFT_3858 | Peptidase M23                                         |
| Lreu23DRAFT_3861 | Protein of unknown function DUF1306                   |
| Lreu23DRAFT_3875 | Terminase small subunit putative P27                  |
| Lreu23DRAFT_3877 | N-6 DNA methylase                                     |
| Lreu23DRAFT_3880 | Hypothetical protein Lreu23DRAFT_3880                 |
| Lreu23DRAFT_3916 | Conserved hypothetical protein                        |
| Lreu23DRAFT_3965 | Exodeoxyribonuclease VII, small subunit               |
| Lreu23DRAFT_3967 | Methenyltetrahydrofolate cyclohydrolase               |
| Lreu23DRAFT_3978 | Phage uncharacterized protein, XkdX family            |
| Lreu23DRAFT_3995 | Hypothetical protein Lreu23DRAFT_3995                 |
| Lreu23DRAFT_4008 | Hypothetical protein Lreu23DRAFT_4008                 |
| Lreu23DRAFT_4026 | Hypothetical protein Lreu23DRAFT_4026                 |
| Lreu23DRAFT_4044 | Protein of unknown function DUF464                    |
| Lreu23DRAFT_4077 | Acyolphosphatase                                      |
| Lreu23DRAFT_4081 | Amino acid permease-associated region                 |
| Lreu23DRAFT_4117 | YSIRK Gram-positive signal peptide                    |
| Lreu23DRAFT_4124 | Conserved hypothetical protein                        |
| Lreu23DRAFT_4133 | Hypothetical protein Lreu23DRAFT_4133                 |
| Lreu23DRAFT_4150 | Mannosyl-glycoprotein endo-beta-N-acetylglucosamidase |
| Lreu23DRAFT_4153 | Carbohydrate kinase, YjeF related protein             |
| Lreu23DRAFT_4155 | Protein of unknown function UPF0150                   |
| Lreu23DRAFT_4159 | DNA-3-methyladenine glycosylase I                     |
| Lreu23DRAFT_4163 | VanZ family protein                                   |
| Lreu23DRAFT_4197 | Hypothetical protein Lreu23DRAFT_4197                 |
| Lreu23DRAFT_4198 | Peptidase M23                                         |
| Lreu23DRAFT_4200 | Phage tape measure protein                            |
| Lreu23DRAFT_4201 | Conserved hypothetical protein                        |
| Lreu23DRAFT_4203 | Major tail 2 family protein                           |
| Lreu23DRAFT_4205 | Phage protein, HK97 gp10 family                       |
| Lreu23DRAFT_4209 | Conserved hypothetical protein                        |
| Lreu23DRAFT_4210 | Hypothetical protein Lreu23DRAFT_4210                 |
| Lreu23DRAFT_4212 | Phage portal protein, SPP1 family                     |
| Lreu23DRAFT_4222 | Hypothetical protein Lreu23DRAFT_4222                 |
| Lreu23DRAFT_4225 | Virulence-associated E family protein                 |
| Lreu23DRAFT_4226 | Bifunctional DNA primase/polymerase                   |
| Lreu23DRAFT_4228 | Hypothetical protein Lreu23DRAFT_4228                 |
| Lreu23DRAFT_4229 | Type III restriction protein res subunit              |
| Lreu23DRAFT_4233 | Hypothetical protein Lreu23DRAFT_4233                 |

---

---

|                  |                                                                                                        |
|------------------|--------------------------------------------------------------------------------------------------------|
| Lreu23DRAFT_4238 | Helix-turn-helix domain protein                                                                        |
| Lreu23DRAFT_4298 | Ribonuclease BN                                                                                        |
| Lreu23DRAFT_4320 | N-acetylmuramoyl-L-alanine amidase family 2                                                            |
| Lreu23DRAFT_4323 | Oxidoreductase                                                                                         |
| Lreu23DRAFT_4335 | Small multidrug resistance protein                                                                     |
| Lreu23DRAFT_4336 | Hypothetical protein Lreu23DRAFT_4336                                                                  |
| Lreu23DRAFT_4346 | Transposase ISLasa1a, IS1223 family<br>Site-specific recombinase, DNA invertase Pin<br>related protein |
| Lreu23DRAFT_4348 |                                                                                                        |
| Lreu23DRAFT_4411 | Peptidase A24A domain protein                                                                          |
| Lreu23DRAFT_4416 | Integrase catalytic region                                                                             |
| Lreu23DRAFT_4433 | UspA domain protein                                                                                    |
| Lreu23DRAFT_4451 | Transcriptional regulator, LysR family                                                                 |
| Lreu23DRAFT_4476 | ABC transporter related                                                                                |
| Lreu23DRAFT_4484 | Mn <sup>2+</sup> /Fe <sup>2+</sup> transporter, NRAMP family                                           |
| Lreu23DRAFT_4487 | Transcriptional regulator, XRE family                                                                  |
| Lreu23DRAFT_4494 | Glycosyl transferase family 2                                                                          |
| Lreu23DRAFT_4498 | Phosphate ABC transporter, ATPase subunit<br>Phosphate ABC transporter, inner membrane<br>subunit PstC |
| Lreu23DRAFT_4500 |                                                                                                        |
| Lreu23DRAFT_4501 | Phosphate binding protein<br>Putative two component transcriptional regulator,<br>winged helix family  |
| Lreu23DRAFT_4502 |                                                                                                        |
| Lreu23DRAFT_4505 | Cobalamin (vitamin B12) biosynthesis CbiM protein                                                      |
| Lreu23DRAFT_4507 | Camphor resistance CrcB protein                                                                        |
| Lreu23DRAFT_4509 | Urease accessory protein UreG                                                                          |
| Lreu23DRAFT_4510 | Urease accessory protein UreF                                                                          |
| Lreu23DRAFT_4514 | Urease, gamma subunit                                                                                  |
| Lreu23DRAFT_4539 | Integrase catalytic region                                                                             |
| Lreu23DRAFT_4584 | Major facilitator superfamily MFS_1                                                                    |
| Lreu23DRAFT_4585 | Hypothetical protein Lreu23DRAFT_4585                                                                  |
| Lreu23DRAFT_4625 | Transcriptional regulator, XRE family                                                                  |
| Lreu23DRAFT_4626 | Conserved hypothetical protein                                                                         |
| Lreu23DRAFT_4630 | Lipoyltransferase and lipoate-protein ligase                                                           |
| Lreu23DRAFT_4673 | Protein tyrosine/serine phosphatase                                                                    |
| Lreu23DRAFT_4691 | Appr-1-p processing domain protein                                                                     |
| Lreu23DRAFT_4695 | Conserved hypothetical protein                                                                         |
| Lreu23DRAFT_4699 | Conserved hypothetical small protein                                                                   |
| Lreu23DRAFT_4701 | Conserved hypothetical protein                                                                         |
| Lreu23DRAFT_4703 | Hypothetical protein Lreu23DRAFT_4703                                                                  |
| Lreu23DRAFT_4711 | Transcriptional regulator, XRE family                                                                  |
| Lreu23DRAFT_4722 | MATE efflux family protein                                                                             |
| Lreu23DRAFT_4760 | Hypothetical protein Lreu23DRAFT_4760                                                                  |
| Lreu23DRAFT_4762 | Hypothetical protein Lreu23DRAFT_4762                                                                  |

---

---

|                  |                                                                              |
|------------------|------------------------------------------------------------------------------|
| Lreu23DRAFT_4763 | Putative transposase                                                         |
| Lreu23DRAFT_4764 | Integrase catalytic region                                                   |
| Lreu23DRAFT_4769 | Conserved hypothetical protein                                               |
| Lreu23DRAFT_4778 | Transcriptional regulator, HxIR family                                       |
| Lreu23DRAFT_4796 | Phenolic acid decarboxylase                                                  |
| Lreu23DRAFT_4799 | Transferase hexapeptide repeat containing protein                            |
| Lreu23DRAFT_4818 | Two component transcriptional regulator, winged helix family                 |
| Lreu23DRAFT_4824 | Integrase catalytic region                                                   |
| Lreu23DRAFT_4833 | Conserved hypothetical protein                                               |
| Lreu23DRAFT_4834 | ABC transporter related                                                      |
| Lreu23DRAFT_4835 | ABC-2 type transporter                                                       |
| Lreu23DRAFT_4851 | Single-stranded nucleic acid binding R3H domain protein                      |
| Lreu23DRAFT_4904 | D-isomer specific 2-hydroxyacid dehydrogenase                                |
| Lreu23DRAFT_4904 | NAD-binding                                                                  |
| Lreu23DRAFT_4949 | ABC transporter related                                                      |
| Lreu23DRAFT_4975 | Dihydroorotate dehydrogenase family protein                                  |
| Lreu23DRAFT_4976 | Orotidine 5'-phosphate decarboxylase                                         |
| Lreu23DRAFT_4977 | Orotate phosphoribosyltransferase                                            |
| Lreu23DRAFT_4988 | Phosphoribosylformylglycinamide synthase, purS                               |
| Lreu23DRAFT_4989 | Phosphoribosylformylglycinamide synthase I                                   |
| Lreu23DRAFT_4990 | Phosphoribosylformylglycinamide synthase II                                  |
| Lreu23DRAFT_4992 | Phosphoribosylformylglycinamide cyclo-ligase                                 |
| Lreu23DRAFT_4994 | Phosphoribosylaminoimidazolecarboxamide formyltransferase/IMP cyclohydrolase |
| Lreu23DRAFT_4995 | Phosphoribosylamine/glycine ligase                                           |
| Lreu23DRAFT_5034 | Binding-protein-dependent transport systems inner membrane component         |
| Lreu23DRAFT_5050 | Hypothetical protein Lreu23DRAFT_5050                                        |
| Lreu23DRAFT_5054 | Relaxase/mobilization nuclease family protein                                |
| Lreu23DRAFT_5078 | Protein of unknown function DUF72                                            |
| Lreu23DRAFT_5107 | Fructose-1,6-bisphosphate aldolase, class II                                 |
| Lreu23DRAFT_5124 | Permease for cytosine/purines uracil thiamine allantoin                      |
| Lreu23DRAFT_5159 | Hypothetical protein Lreu23DRAFT_5159                                        |
| Lreu23DRAFT_5160 | Hypothetical protein Lreu23DRAFT_5160                                        |
| Lreu23DRAFT_5177 | L-serine dehydratase, iron-sulfur-dependent, alpha subunit                   |
| Lreu23DRAFT_5180 | LPXTG-motif cell wall anchor domain protein                                  |

---
